# Supplementary material for: METTL3-mediated N6-methyladenosine modification is critical for epithelial-mesenchymal transition and metastasis of gastric cancer
Source: PubMed Central journal article supplement (PMC6790244; doi:10.1186/s12943-019-1065-4), 2019-10-13
Supplement: 12943_2019_1065_MOESM1_ESM.pdf [file 12943_2019_1065_MOESM1_ESM.pdf]

**Supplementary Table S1.** shRNA, siRNA and primer sequences.

---

|                                  |                            |
|----------------------------------|----------------------------|
| sh-METTL3-1                      | GCAAGAATTCTGTGACTAT        |
| sh-METTL3-2                      | GCTGCACTTCAGACGAATT        |
| sh-HuR                           | GAGGCAATTACCAGTTTCA        |
| sh-ZMYM1                         | GCTGTGGAAGAGAGTCATT        |
| si-CtBP1                         | GGGAGGACCTGGAGAAGTT        |
| si-LSD1                          | AAGGAAAGCTAGAAGAAAA        |
| si-CoREST                        | CAAAGTTGGATGAATACAT        |
| METTL3 forward primer            | CCAGCACAGCTTCAGCAGTTCC     |
| METTL3 reverse primer            | GCGTGGAGATGGCAAGACAGATG    |
| E-cadherin forward primer        | GCCCCATCAGGCCTCCGTTT       |
| E-cadherin reverse primer        | ACCTTGCCTTCTTTGTCTTTGTTGGA |
| N-cadherin forward primer        | TGGACCATCACTCGGCTTA        |
| N-cadherin reverse primer        | ACACTGGCAAACCTTCACG        |
| Vimentin forward primer          | CGAAACTTCTCAGCATCACG       |
| Vimentin reverse primer          | GCAGAAAGGCACTTGAAAGC       |
| ZMYM1 forward primer             | AGACACCGATGTTGCCTTGCC      |
| ZMYM1 reverse primer             | CGCTTGGCTGTTCCGTACTACTAC   |
| HuR forward primer               | ACTGAACCGTGCTGCTGTTGG      |
| HuR reverse primer               | AGGAATTGCCACTAACCGTCTTCG   |
| GAPDH forward primer             | GGAGCGAGATCCCTCCAAAAT      |
| GAPDH reverse primer             | GGCTGTTGTCATACTTCTCAGG     |
| E-cadherin (CRS) forward primer: | GTAAAAGCCCTTTCTGATCCCAGG   |
| E-cadherin (CRS) reverse primer: | TCACAGGTGCTTTGCAGTTCCGA    |
| E-cadherin (Neg) forward primer: | AAACAGAGGGCAGGCACAGT       |
| E-cadherin (Neg) reverse primer: | TCGGCTCACTGCACTCTCTG       |

---
