# Supplementary material for: METTL3-mediated N6-methyladenosine modification is critical for epithelial-mesenchymal transition and metastasis of gastric cancer
Source: PubMed Central journal article supplement (PMC6790244; doi:10.1186/s12943-019-1065-4), 2019-10-13
Supplement: 12943_2019_1065_MOESM2_ESM.pdf [file 12943_2019_1065_MOESM2_ESM.pdf]

**Supplementary Table S2.** Association between METTL3 expression and clinicopathological characteristics in gastric cancer.

| Characteristics | n=120<br>(%) | METTL3 expression    |                  |                    | <i>p</i> value |
|-----------------|--------------|----------------------|------------------|--------------------|----------------|
|                 |              | Negative<br>n=36 (%) | Weak<br>n=44 (%) | Strong<br>n=40 (%) |                |
| Age (years)     |              |                      |                  |                    | 0.413          |
| <60             | 70 (58.3)    | 22 (61.1)            | 28 (63.6)        | 20 (50.0)          |                |
| ≥60             | 50 (41.7)    | 14 (38.9)            | 16 (36.4)        | 20 (50.0)          |                |
| Gender          |              |                      |                  |                    | 0.203          |
| Male            | 79 (65.8)    | 20 (55.6)            | 29 (65.9)        | 30 (75.0)          |                |
| Female          | 41 (34.2)    | 16 (44.4)            | 15 (34.1)        | 10 (25.0)          |                |
| pT stage        |              |                      |                  |                    | 0.064          |
| T1              | 11 (9.2)     | 5 (13.9)             | 3 (6.8)          | 3 (7.5)            |                |
| T2              | 29 (49.2)    | 13 (30.6)            | 12 (27.3)        | 4 (10.0)           |                |
| T3              | 25 (20.8)    | 3 (8.3)              | 11 (25.0)        | 11 (27.5)          |                |
| T4              | 55 (45.8)    | 15 (41.7)            | 18 (40.9)        | 22 (55.0)          |                |
| pN stage        |              |                      |                  |                    | 0.003*         |
| N0              | 59 (49.2)    | 26 (72.3)            | 22 (50.0)        | 11 (27.5)          |                |
| N1              | 15 (12.5)    | 4 (11.1)             | 6 (13.6)         | 5 (12.5)           |                |
| N2              | 21 (17.5)    | 3 (8.3)              | 5 (11.4)         | 13 (32.5)          |                |
| N3              | 25 (20.8)    | 3 (8.3)              | 11 (25.0)        | 11 (27.5)          |                |
| pM stage        |              |                      |                  |                    | 0.001*         |
| M0              | 97 (80.8)    | 34 (94.4)            | 38 (86.4)        | 25 (62.5)          |                |
| M1              | 23 (19.2)    | 2 (5.6)              | 6 (13.6)         | 15 (37.5)          |                |
| TNM stage       |              |                      |                  |                    | <0.001*        |
| I / II          | 59 (49.2)    | 27 (75.0)            | 23 (52.3)        | 9 (22.5)           |                |
| III/IV          | 61 (50.8)    | 9 (25.0)             | 21 (47.7)        | 31 (77.5)          |                |
| Differentiation |              |                      |                  |                    | 0.278          |
| Well            | 27 (22.5)    | 12 (33.3)            | 9 (20.5)         | 6 (15.0)           |                |
| Moderate        | 27 (22.5)    | 9 (25.0)             | 10 (22.7)        | 8 (20.0)           |                |
| Poor            | 66 (55.0)    | 15 (41.7)            | 25 (56.8)        | 26 (65.0)          |                |
| Vessel invasion |              |                      |                  |                    | 0.014*         |
| No              | 105 (87.5)   | 33 (91.7)            | 42 (95.5)        | 30 (75.0)          |                |
| Yes             | 15 (12.5)    | 3 (8.3)              | 2 (4.5)          | 10 (25.0)          |                |

\* $p < 0.05$  represents the *p*-values with significant differences.
