# Supplementary material for: METTL3-mediated N6-methyladenosine modification is critical for epithelial-mesenchymal transition and metastasis of gastric cancer
Source: PubMed Central journal article supplement (PMC6790244; doi:10.1186/s12943-019-1065-4), 2019-10-13
Supplement: 12943_2019_1065_MOESM3_ESM.pdf [file 12943_2019_1065_MOESM3_ESM.pdf]

**Supplementary Table S3.** Univariate and multivariate analysis of overall survival (OS) after surgery.

| Variable        | Univariate analysis |              |                | Multivariate analysis |             |                |
|-----------------|---------------------|--------------|----------------|-----------------------|-------------|----------------|
|                 | HR                  | 95% CI       | <i>p</i> value | HR                    | 95% CI      | <i>p</i> value |
| Age             | 1.328               | 0.781-2.259  | 0.295          | —                     | —           | —              |
| Gender          | 0.823               | 0.468-1.445  | 0.497          | —                     | —           | —              |
| Differentiation | 1.335               | 0.949-1.879  | 0.097          | —                     | —           | —              |
| T stage         | 1.477               | 1.115-1.958  | 0.007*         | —                     | —           | —              |
| TNM stage       | 7.258               | 3.768-13.983 | <0.001*        | 4.664                 | 2.330-9.334 | <0.001*        |
| Vessel invasion | 4.778               | 2.515-9.075  | <0.001*        | 2.156                 | 1.104-4.208 | 0.024*         |
| METTL3          | 3.558               | 2.372-5.338  | <0.001*        | 2.794                 | 1.829-4.267 | <0.001*        |

HR: Hazard ratio; 95% CI: 95% confidence interval.

\* $p < 0.05$  represents the *p*-values with significant differences.
