# Supplementary material for: METTL3-mediated N6-methyladenosine modification is critical for epithelial-mesenchymal transition and metastasis of gastric cancer
Source: PubMed Central journal article supplement (PMC6790244; doi:10.1186/s12943-019-1065-4), 2019-10-13
Supplement: 12943_2019_1065_MOESM4_ESM.pdf [file 12943_2019_1065_MOESM4_ESM.pdf]

**Supplementary Table S4.** Univariate and multivariate analysis of disease-free survival (DFS) after surgery.

| Variable        | Univariate analysis |              |                | Multivariate analysis |             |                |
|-----------------|---------------------|--------------|----------------|-----------------------|-------------|----------------|
|                 | HR                  | 95% CI       | <i>p</i> value | HR                    | 95% CI      | <i>p</i> value |
| Age             | 1.084               | 0.650-1.806  | 0.758          | —                     | —           | —              |
| Gender          | 0.931               | 0.549-1.580  | 0.791          | —                     | —           | —              |
| Differentiation | 1.394               | 0.999-1.946  | 0.051          | —                     | —           | —              |
| T stage         | 1.492               | 1.139-1.954  | 0.004*         | —                     | —           | —              |
| TNM stage       | 6.760               | 3.664-12.473 | <0.001*        | 4.744                 | 2.472-9.105 | <0.001*        |
| Vessel invasion | 4.998               | 2.689-9.291  | <0.001*        | 2.439                 | 1.273-4.672 | 0.007*         |
| METTL3          | 2.971               | 2.061-4.283  | <0.001*        | 2.440                 | 1.670-3.567 | <0.001*        |

HR: Hazard ratio; 95% CI: 95% confidence interval.

\* $p < 0.05$  represents the *p*-values with significant differences.
